# Supplementary material for: Self-Enhancement of Hepatitis C Virus Replication by Promotion of Specific Sphingolipid Biosynthesis
Source: PubMed Central journal article supplement (PMC3420934; doi:10.1371/journal.ppat.1002860), 2012-08-16
Supplement: ppat.1002860.s011.pdf [file ppat.1002860.s011.pdf]

**Table S1**

| Tissue             | Distribution of radioactivity ( % of dose ) |             |             |             |
|--------------------|---------------------------------------------|-------------|-------------|-------------|
|                    | 0.5 h                                       | 2 h         | 8 h         | 24 h        |
| Cerebrum           | 0.00 ± 0.00                                 | 0.00 ± 0.00 | 0.00 ± 0.00 | N.D.        |
| Cerebellum         | 0.00 ± 0.00                                 | 0.00 ± 0.00 | 0.00 ± 0.00 | 0.00 ± 0.00 |
| Pituitary gland    | 0.00 ± 0.00                                 | N.D.        | N.D.        | N.D.        |
| Eyeballs           | 0.00 ± 0.00                                 | 0.00 ± 0.00 | 0.00 ± 0.00 | 0.00 ± 0.00 |
| Submaxillary gland | 0.00 ± 0.00                                 | 0.00 ± 0.00 | 0.00 ± 0.00 | 0.00 ± 0.00 |
| Thyroid            | 0.00 ± 0.00                                 | N.D.        | N.D.        | N.D.        |
| Thymus             | 0.00 ± 0.00                                 | 0.00 ± 0.00 | 0.00 ± 0.00 | 0.00 ± 0.00 |
| Heart              | 0.00 ± 0.00                                 | 0.00 ± 0.00 | 0.00 ± 0.00 | N.D.        |
| Lung               | 0.02 ± 0.01                                 | 0.01 ± 0.00 | 0.00 ± 0.00 | 0.00 ± 0.00 |
| Liver              | 16.77 ± 1.99                                | 1.03 ± 0.69 | 0.10 ± 0.03 | 0.03 ± 0.01 |
| Adrenal            | 0.00 ± 0.00                                 | 0.00 ± 0.00 | 0.00 ± 0.00 | 0.00 ± 0.00 |
| Kidney             | 0.35 ± 0.03                                 | 0.21 ± 0.01 | 0.07 ± 0.02 | 0.03 ± 0.01 |
| Spleen             | 0.00 ± 0.00                                 | 0.00 ± 0.00 | 0.00 ± 0.00 | 0.00 ± 0.00 |
| Pancreas           | 0.01 ± 0.01                                 | 0.00 ± 0.00 | 0.00 ± 0.00 | 0.00 ± 0.00 |
| Prostate           | 0.00 ± 0.00                                 | 0.00 ± 0.00 | 0.00 ± 0.00 | 0.00 ± 0.00 |
| Testis             | 0.02 ± 0.00                                 | 0.01 ± 0.00 | 0.00 ± 0.00 | 0.00 ± 0.00 |
| Epididymis         | 0.01 ± 0.01                                 | 0.00 ± 0.00 | 0.00 ± 0.00 | 0.00 ± 0.00 |
| Seminal vesicle    | 0.00 ± 0.01                                 | 0.00 ± 0.00 | 0.00 ± 0.00 | N.D.        |
| Bladder            | 0.00 ± 0.00                                 | 0.00 ± 0.00 | 0.00 ± 0.00 | 0.00 ± 0.00 |
| Stomach            | 0.15 ± 0.20                                 | 0.00 ± 0.00 | 0.00 ± 0.00 | 0.00 ± 0.00 |
| Small intestine    | 4.44 ± 2.02                                 | 1.24 ± 0.68 | 0.06 ± 0.03 | 0.00 ± 0.01 |
| Cecum              | 0.01 ± 0.00                                 | 0.00 ± 0.00 | 0.07 ± 0.01 | 0.00 ± 0.01 |
| Large intestine    | 0.01 ± 0.00                                 | 0.00 ± 0.01 | 0.14 ± 0.07 | 0.00 ± 0.01 |

Each value represents the mean ± S.D. of three animals

N.D.: Not detected
